# Supplementary material
Source: PubMed Central journal article supplement (PMC3159059)
Supplement: supp_jn.111.141176_nut_141176_SF1-3.pdf [file supp_jn.111.141176_nut_141176_SF1-3.pdf]

Online supporting material

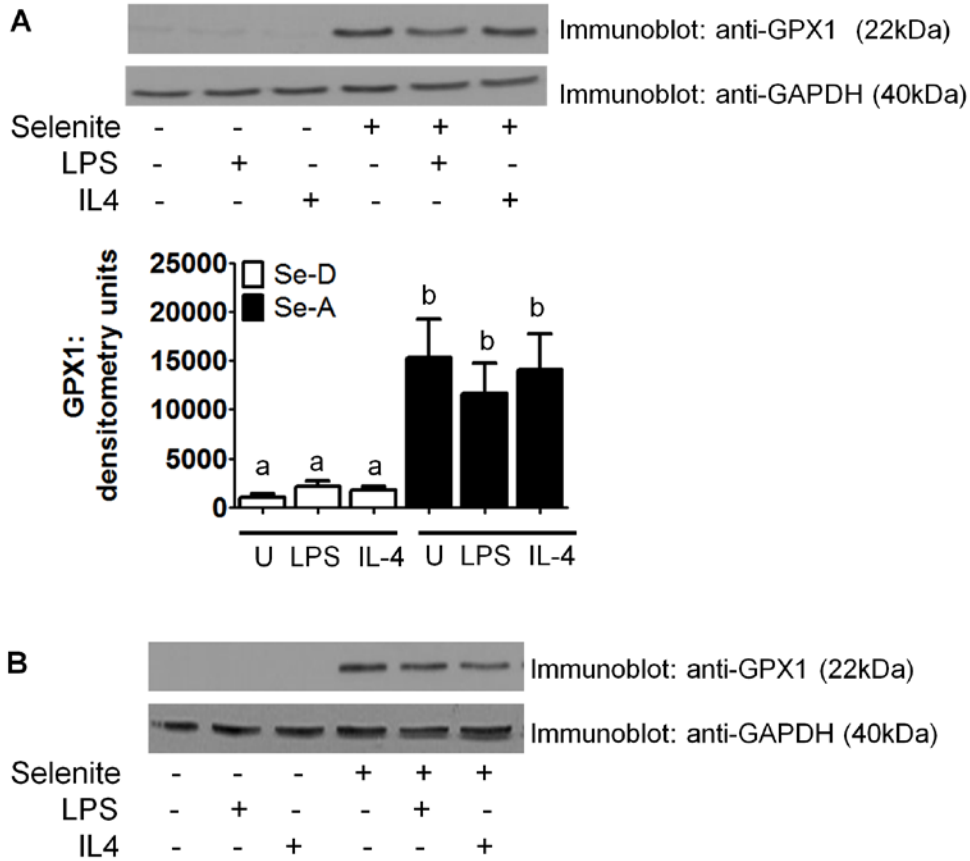

**Supplemental Fig. 1:** *Effect of inorganic selenium on the expression of GPX1 in macrophages.* (A). BMDM were isolated from Se-D or Se-A mice. Cells were stimulated with IL-4 (5 mg/L) for 20 h or LPS (1 mg/L) for 12 h. (B). RAW 264.7 macrophages were cultured in the absence or presence of Se for 4 d, and GPX1 expression was examined. Bands were evaluated by densitometry. Values are means  $\pm$  SEM, n=3. Data was analyzed by ANOVA with tukey post-hoc testing. Within each graph, means without a common letter differ, a>b>c; P < 0.01.

Online supporting material

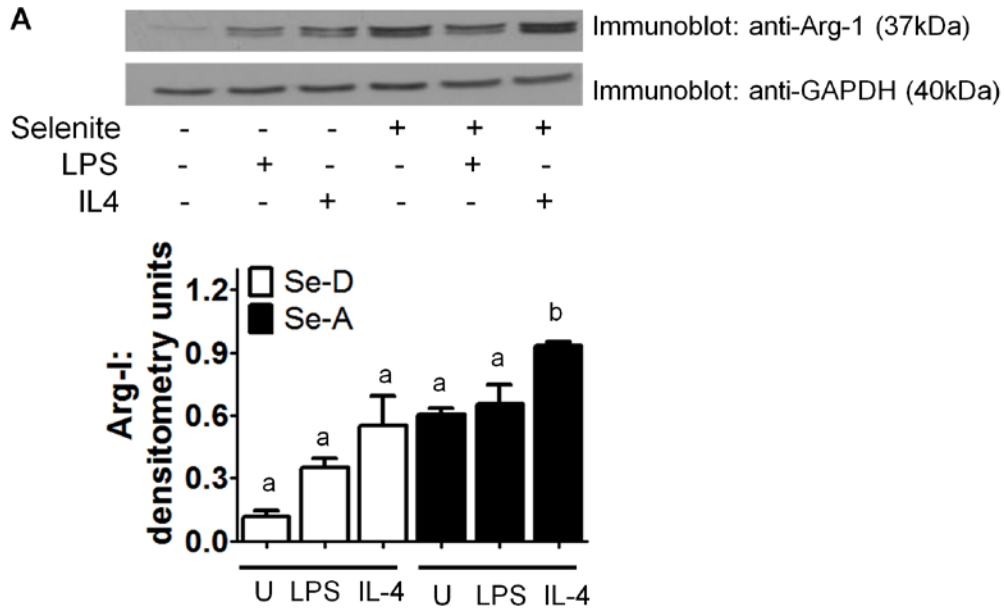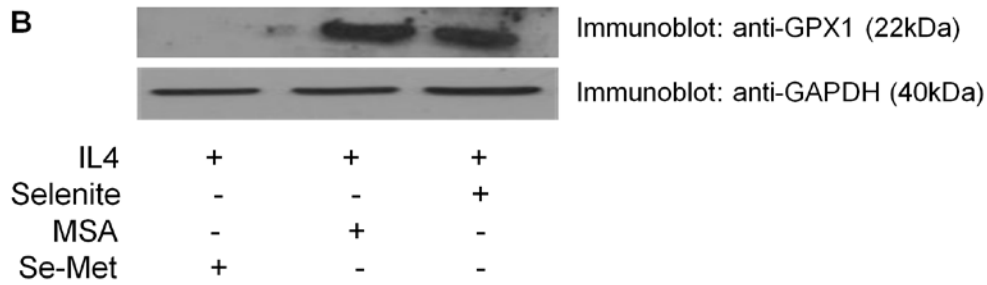

**Supplemental Fig. 2. Selenium supplementation of macrophages increases Arg-1 expression**

BMDM were stimulated with IL-4 (5mg/L; 20 h) and LPS (1mg/L; 12 h) and prepared for western blot analysis. Bands were evaluated by densitometry. Data was analyzed by ANOVA with tukey post-hoc testing. Within each graph, means without a common letter differ,  $a > b > c$ ;  $P < 0.01$ .

### Online supporting material

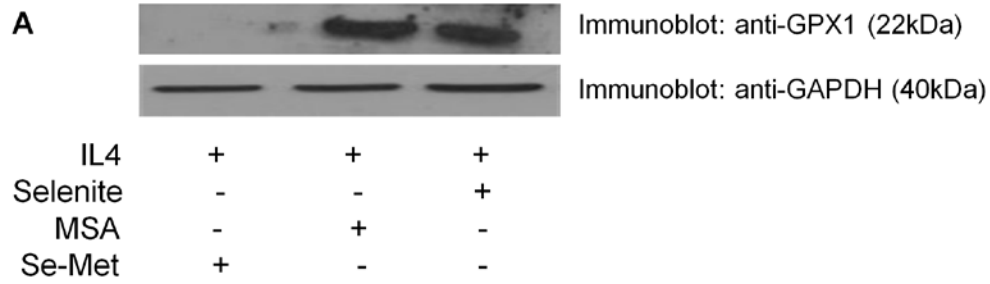

**Supplemental Fig. 3.** *Selenium in the form of selenoproteins is essential for Arg-I expression*  
Following treatment with sodium selenite, MSA, or Se-Met, RAW 264.7 were stimulated with IL-4 (5mg/L; 20 h) and prepared for western blot analysis. Values are representative data from one experiment, which is indicative of a pattern seen.
